# Supplementary material for: Copper(ii) cubanes with a {Cu4O} core and well defined S = 1 ground state
Source: Royal Society of Chemistry journal article supplement (doi:10.1039/c5dt03643g), 2015-12-08
Supplement: c5dt03643g1.pdf [file c5dt03643g1.pdf]

ELECTRONIC SUPPLEMENTARY INFORMATION for

**Copper(II) cubanes with {Cu<sub>4</sub>O<sub>4</sub>} core and well defined S = 1 ground state.**

**Table S1.** Magnetic and structural data for the complexes plotted in Figure 9.

| <i>Refcode</i> | <i>S</i> | <i>J</i>      | <i>Mean angle</i> | $\alpha$ | $\beta$ | $\gamma$ | $\delta$ | <i>DIST1</i> | <i>DIST2</i> | <i>DIST3</i> | <i>DIST4</i> |
|----------------|----------|---------------|-------------------|----------|---------|----------|----------|--------------|--------------|--------------|--------------|
| <b>DARKOW</b>  | 2        | <b>57</b>     | <b>104.28</b>     | 104.283  | 104.283 | 104.283  | 104.283  | 2.474        | 2.474        | 2.474        | 2.474        |
| <b>XINYUP</b>  | 2        | <b>61</b>     | <b>106.32</b>     | 106.647  | 106.476 | 105.273  | 106.88   | 2.452        | 2.4          | 2.413        | 2.415        |
| <b>XEXZUX</b>  | 2        | <b>54.6</b>   | <b>107.12</b>     | 105.701  | 109.112 | 105.167  | 108.49   | 2.479        | 2.502        | 2.447        | 2.454        |
| <b>LIJQEA</b>  | ---      | <b>0</b>      | <b>109.39</b>     | 110.013  | 108.262 | 109.575  | 109.695  | 2.859        | 2.785        | 2.838        | 2.787        |
| <b>JELPUL</b>  | 0        | <b>-130</b>   | <b>109.52</b>     | 111.033  | 109.318 | 109.898  | 107.84   | 2.752        | 2.723        | 2.636        | 2.693        |
| <b>HAKXIB</b>  | 2        | <b>10.4</b>   | <b>109.70</b>     | 110.859  | 108.694 | 108.92   | 110.34   | 2.608        | 2.573        | 2.644        | 2.541        |
| <b>LIJQIE</b>  | ---      | <b>0</b>      | <b>109.95</b>     | 109.994  | 109.07  | 108.956  | 111.785  | 2.86         | 2.804        | 2.833        | 2.8          |
| <b>WEMSUE</b>  | 0        | <b>-4.5</b>   | <b>110.04</b>     | 109.885  | 110.197 | 109.885  | 110.197  | 2.544        | 2.544        | 2.573        | 2.573        |
| <b>NINPEG</b>  | 0        | <b>-74.8</b>  | <b>110.10</b>     | 110.102  | 110.102 | 110.102  | 110.102  | 2.577        | 2.577        | 2.577        | 2.577        |
| <b>BOQZUD</b>  | 0        | <b>-69.8</b>  | <b>111.29</b>     | 112.092  | 110.483 | 112.092  | 110.483  | 2.697        | 2.697        | 2.679        | 2.679        |
| <b>DARKUC</b>  | 2        | <b>34.8</b>   | <b>112.06</b>     | 112.055  | 112.055 | 112.055  | 112.055  | 2.748        | 2.748        | 2.748        | 2.748        |
| <b>UFATOL</b>  | 0        | <b>-117</b>   | <b>112.10</b>     | 112.099  | 112.099 | 112.099  | 112.099  | 2.706        | 2.706        | 2.706        | 2.706        |
| <b>BOGCOP</b>  | 2        | <b>34.2</b>   | <b>112.44</b>     | 112.439  | 112.439 | 112.439  | 112.439  | 2.734        | 2.734        | 2.734        | 2.734        |
| <b>UFATUR</b>  | 0        | <b>-111</b>   | <b>112.54</b>     | 112.952  | 112.328 | 111.869  | 112.996  | 2.705        | 2.703        | 2.753        | 2.753        |
| <b>LOCPIE</b>  | 0        | <b>-73.6</b>  | <b>112.93</b>     | 112.932  | 112.932 | 112.932  | 112.932  | 2.686        | 2.686        | 2.686        | 2.686        |
| <b>VAVGUW</b>  | 0        | <b>-75</b>    | <b>113.07</b>     | 113.068  | 113.068 | 113.068  | 113.068  | 2.724        | 2.724        | 2.724        | 2.724        |
| <b>POLKEH</b>  | 0        | <b>-136</b>   | <b>113.35</b>     | 113.55   | 113.509 | 113.085  | 113.259  | 2.692        | 2.696        | 2.672        | 2.665        |
| <b>NODHEV</b>  | 0        | <b>-80.5</b>  | <b>114.05</b>     | 114.009  | 114.086 | 114.009  | 114.086  | 2.722        | 2.722        | 2.73         | 2.73         |
| <b>NILDAP</b>  | 0        | <b>-118.8</b> | <b>117.00</b>     | 117      | 117     | 117      | 117      | 2.865        | 2.865        | 2.865        | 2.865        |

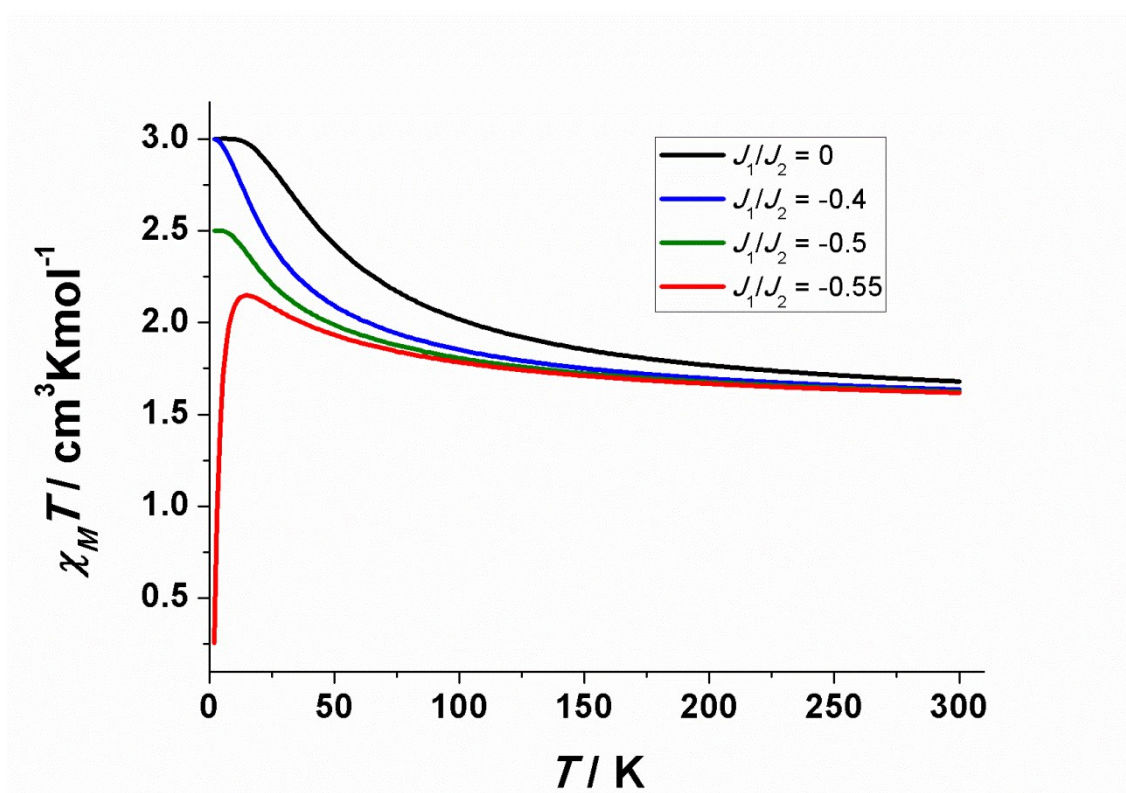

**Figure S1.** Simulation of the coupling constants for the (2:4) model and ratios around  $-1/2$  for ferromagnetic  $J_2$  constants. The similar shape of these simulations with those due to the effect of  $D$  in the ground state, leads erroneously to  $J_1 \approx -J_2/2$  fit values. For a correct analysis of  $\text{Cu}^{\text{II}}$  cubes exhibiting this kind of plots see reference 21 (E. A. Buvaylo, V. N. Kozay, O. Yu. Vassilyeva, B. W. Skelton, J. Jezierska, L. C. Brunel and A. Ozarowski, *Inorg.Chem.*, 2005, **44**, 206).
